# Supplementary material for: The piRNA pathway responds to environmental signals to establish intergenerational adaptation to stress
Source: PubMed Central journal article supplement (PMC6145337; doi:10.1186/s12915-018-0571-y), 2018-09-18
Supplement: 12915_2018_571_MOESM3_ESM.pdf [file 12915_2018_571_MOESM3_ESM.pdf]

A

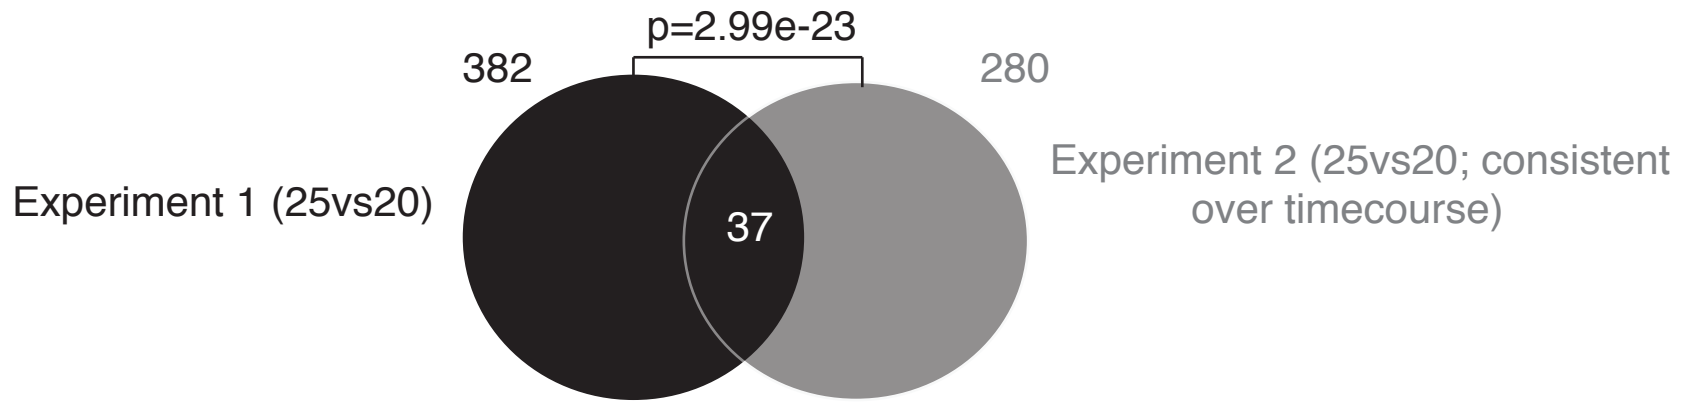

B

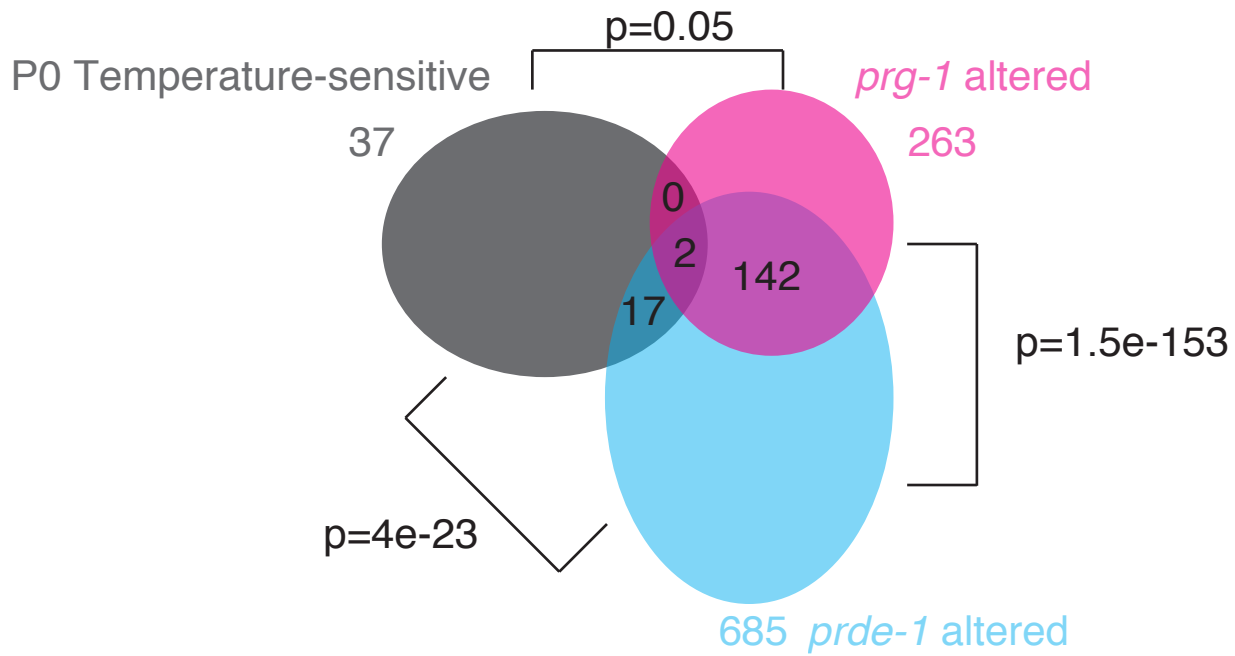

C

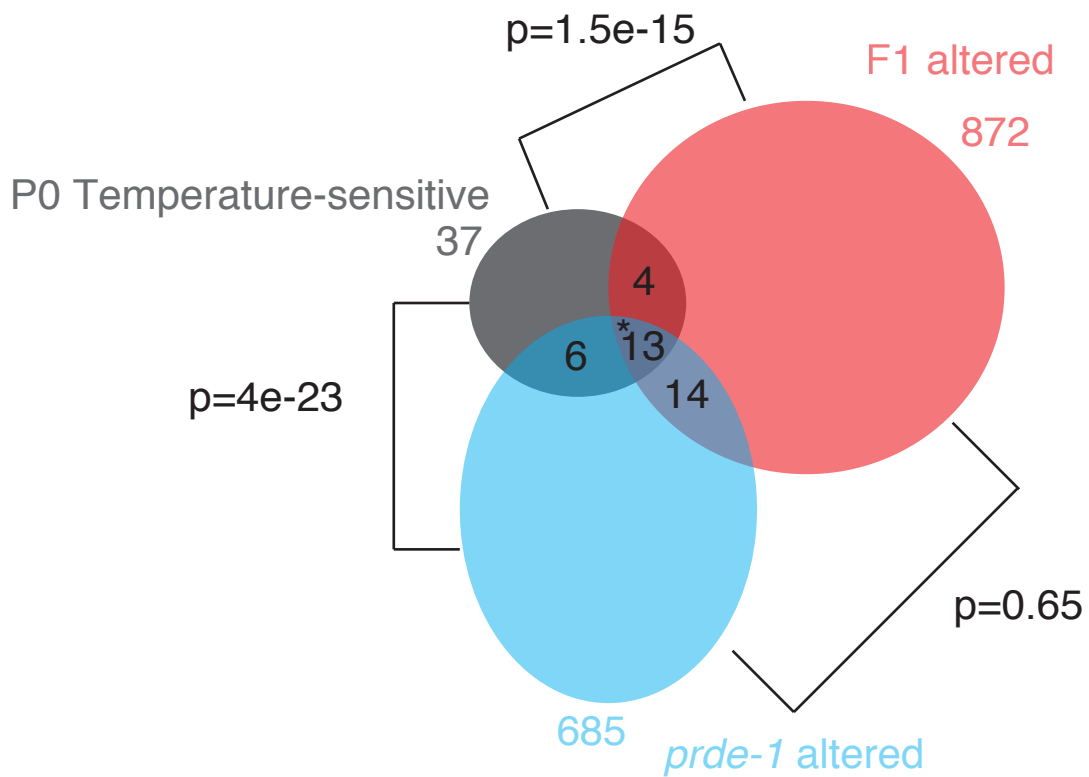

\* $p=0.008$  (*prde-1* regulated genes are more likely to be transmitted intergenerationally than expected)

Figure S3
