# Supplementary material for: The piRNA pathway responds to environmental signals to establish intergenerational adaptation to stress
Source: PubMed Central journal article supplement (PMC6145337; doi:10.1186/s12915-018-0571-y), 2018-09-18
Supplement: 12915_2018_571_MOESM5_ESM.pdf [file 12915_2018_571_MOESM5_ESM.pdf]

**A**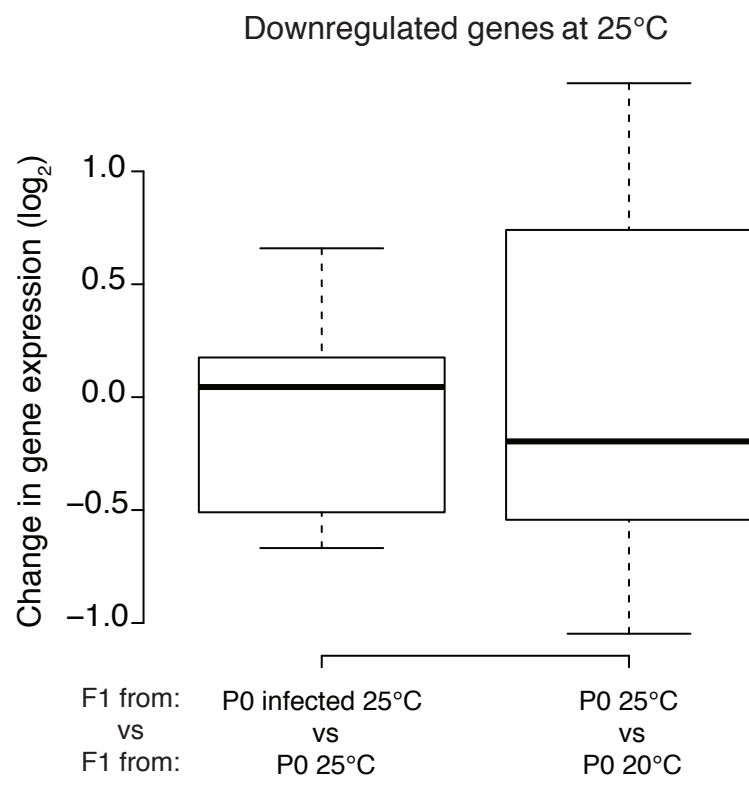**B**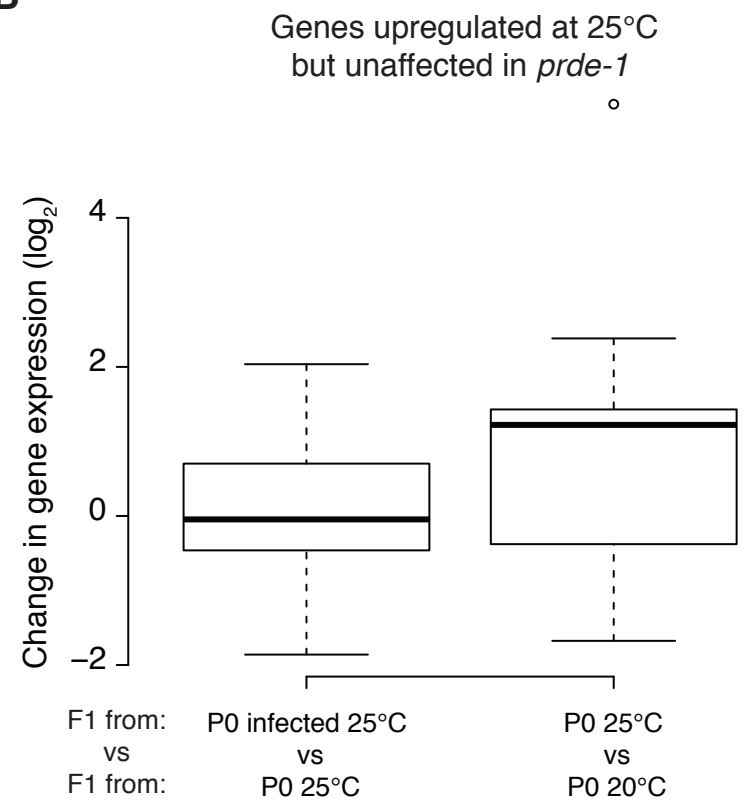

Figure S5
